# Supplementary material
Source: MDPI journal article supplement (https://www.mdpi.com/2073-4344/9/2/186)
Supplement: s1 [file s1]

Supplementary Materials  
for

**Dehydration of Bioethanol to Ethylene over H-ZSM-5 Catalysts: A Scale-Up Study**

Sanggil Moon <sup>1</sup>, Ho-Jeong Chae <sup>1,2,\*</sup> and Min Bum Park <sup>3,\*</sup>

<sup>1</sup> CO<sub>2</sub> Energy Vector Research Group, Carbon Resources Institute, Korea Research Institute of Chemical Technology, Daejeon 34114, Korea

<sup>2</sup> Department of Green Chemistry and Biotechnology, University of Science and Technology, Daejeon 34113, Korea

<sup>3</sup> Innovation Center for Chemical Engineering, Department of Energy and Chemical Engineering, Incheon National University, Incheon 22012, Korea

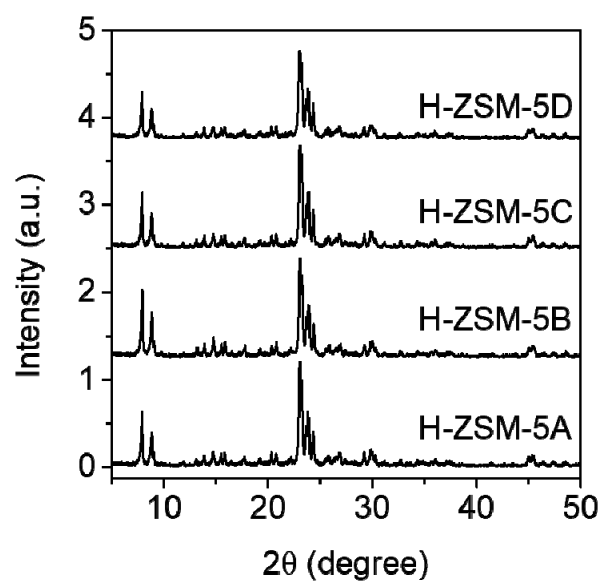

**Figure S1.** Powder XRD patterns of H-ZSM-5A, H-ZSM-5B, H-ZSM-5C, and H-ZSM-5D.

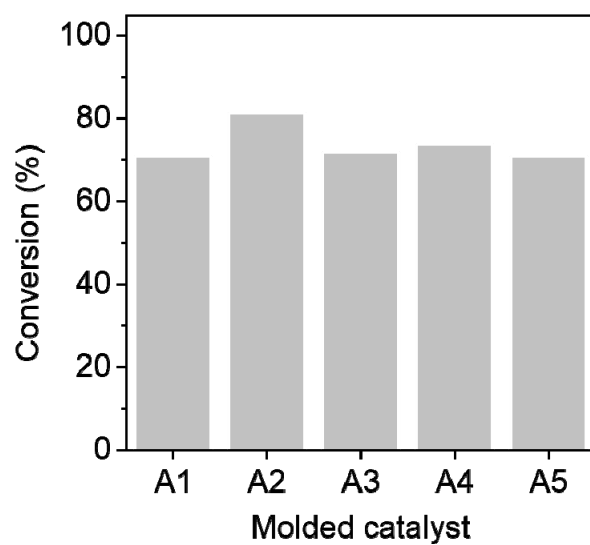

**Figure S2.** Ethanol conversion obtained after 3 h on steam in dehydration of bioethanol over 2 g of molded H-ZSM-5A1, H-ZSM-5A2, H-ZSM-5A3, H-ZSM-5A4, and H-ZSM-5A5 catalysts at 250 °C and 5 h<sup>-1</sup> WHSV.
